# Supplementary material for: Transcriptome and Metabolome Profiling Unveil Pigment Formation Variations in Brown Cotton Lines (Gossypium hirsutum L.)
Source: MDPI journal article supplement (doi:10.3390/ijms24065249), 2023-03-09
Supplement: s1 [file s1]

Table S1. Top 20 differentially expressed metabolites in W18 vs L18 comparison

| Index      | Formula                                         | Metabolite Name                                       | Log <sub>2</sub> (Fold Change)<br>WCF/LCF | Class         | VIP  |
|------------|-------------------------------------------------|-------------------------------------------------------|-------------------------------------------|---------------|------|
| lmhn000921 | C <sub>20</sub> H <sub>18</sub> O <sub>14</sub> | 3, 4, 5, 3', 4', 5'-Hexahydroxydiphenoyl acid-glucose | 16.33                                     | Tanin         | 1.38 |
| mws1639    | C <sub>11</sub> H <sub>10</sub> O <sub>5</sub>  | Isofraxidin                                           | 13.93                                     | Coumarin      | 1.34 |
| mws0180    | C <sub>7</sub> H <sub>6</sub> O <sub>4</sub>    | 2,5-Dihydroxybenzoic acid; Gentisic Acid              | 13.52                                     | Phenolic acid | 1.38 |
| pmb3012    | C <sub>22</sub> H <sub>22</sub> O <sub>11</sub> | Chrysoeriol-7-O-glucoside*                            | 13.41                                     | Flavonoid     | 1.38 |
| hmpn005101 | C <sub>21</sub> H <sub>24</sub> O <sub>11</sub> | Sieboldin                                             | 13.36                                     | Chalcone      | 1.39 |
| cmxn004016 | C <sub>21</sub> H <sub>24</sub> O <sub>11</sub> | Dihydromarein                                         | 13.25                                     | Chalcone      | 1.38 |
| pmb2999    | C <sub>22</sub> H <sub>22</sub> O <sub>11</sub> | Chrysoeriol-5-O-glucoside*                            | 13.17                                     | Flavonoid     | 1.38 |
| pmb3062    | C <sub>17</sub> H <sub>22</sub> O <sub>10</sub> | 1-O-Eudesmoylquinic acid                              | 12.05                                     | Phenolic acid | 1.38 |
| lmbn014696 | C <sub>20</sub> H <sub>30</sub> O <sub>2</sub>  | Pimaric acid                                          | 11.98                                     | Diterpenoid   | 1.38 |
| Pmb3000    | C <sub>24</sub> H <sub>24</sub> O <sub>12</sub> | Chrysoeriol-7-O-(6''-acetyl)glucoside                 | 11.98                                     | Flavonoid     | 1.38 |
| zmxp003107 | C <sub>27</sub> H <sub>30</sub> O <sub>16</sub> | Luteolin-7,3'-di-O-glucoside*                         | -15.51                                    | Flavonoid     | 1.38 |
| hmbp002498 | C <sub>21</sub> H <sub>26</sub> O <sub>13</sub> | Scopoletin-7-O-xylosyl(1→6)glucoside                  | -13.44                                    | Coumarin      | 1.38 |
| hmpp002612 | C <sub>27</sub> H <sub>30</sub> O <sub>16</sub> | Luteolin-7-O-gentiobioside*                           | -13.19                                    | Flavonoid     | 1.38 |
| zmxp002867 | C <sub>28</sub> H <sub>32</sub> O <sub>16</sub> | Chrysoeriol-5,7-di-O-glucoside                        | -9.34                                     | Flavonoid     | 1.37 |
| hmqp002870 | C <sub>32</sub> H <sub>38</sub> O <sub>20</sub> | Luteolin-7-O-Sophoroside-5-O-arabinoside              | -4.17                                     | Flavonoid     | 1.37 |
| lmhn002573 | C <sub>17</sub> H <sub>20</sub> O <sub>11</sub> | Sinapoylglucuronic acid                               | -3.70                                     | Phenolic acid | 1.37 |
| lmgm002253 | C <sub>31</sub> H <sub>36</sub> O <sub>18</sub> | Syringoylcaffeoylquinic acid-D-glucose                | -3.57                                     | Phenolic acid | 1.32 |
| hmcn002743 | C <sub>22</sub> H <sub>26</sub> O <sub>8</sub>  | Lirioresinol A                                        | -3.03                                     | Lignan        | 1.00 |
| hmtp000776 | C <sub>8</sub> H <sub>9</sub> NO <sub>3</sub>   | 4,5,6-Trihydroxy-2-cyclohexen-1-ylideneacetonitrile   | -2.81                                     | Alkaloid      | 1.38 |
| pmb4777    | C <sub>16</sub> H <sub>18</sub> O <sub>8</sub>  | 4-Hydroxy-7-methoxycoumarin-β-rhamnoside*             | -2.51                                     | Coumarin      | 1.35 |

Table S2. List of top 20 differentially expressed metabolites in W18 vs D18

| Index      | Formula                                         | Metabolite Name                                        | <u>Log<sub>2</sub> (Fold Change)</u><br>WCF/DCF | Class         | VIP  |
|------------|-------------------------------------------------|--------------------------------------------------------|-------------------------------------------------|---------------|------|
| lmhn000921 | C <sub>20</sub> H <sub>18</sub> O <sub>14</sub> | 3, 4, 5, 3', 4', 5'-Hexahydroxydiphenoyl acid-glucose  | 16.04                                           | Tanin         | 1.38 |
| cmxn004016 | C <sub>21</sub> H <sub>24</sub> O <sub>11</sub> | Dihydromarein                                          | 13.72                                           | Chalcone      | 1.38 |
| lmmp003349 | C <sub>19</sub> H <sub>30</sub> O <sub>7</sub>  | Byzantionoside A                                       | 13.69                                           | Others        | 1.38 |
| hmpn005101 | C <sub>21</sub> H <sub>24</sub> O <sub>11</sub> | Sieboldin                                              | 13.61                                           | Chalcone      | 1.39 |
| lmzn006284 | C <sub>30</sub> H <sub>48</sub> O <sub>4</sub>  | 2 $\alpha$ -Hydroxyursolic acid                        | 13.61                                           | Triterpene    | 1.36 |
| mws0180    | C <sub>7</sub> H <sub>6</sub> O <sub>4</sub>    | 2,5-Dihydroxybenzoic acid; Gentisic Acid               | 13.14                                           | Phenolic acid | 1.38 |
| pmb3012    | C <sub>22</sub> H <sub>22</sub> O <sub>11</sub> | Chrysoeriol-7-O-glucoside                              | 12.63                                           | Flavonoid     | 1.38 |
| pmb2999    | C <sub>22</sub> H <sub>22</sub> O <sub>11</sub> | Chrysoeriol-5-O-glucoside                              | 12.59                                           | Flavonoid     | 1.38 |
| pmb3062    | C <sub>17</sub> H <sub>22</sub> O <sub>10</sub> | 1-O-Eudesmoylquinic acid                               | 12.14                                           | Phenolic acid | 1.38 |
| pmn001468  | C <sub>19</sub> H <sub>26</sub> O <sub>13</sub> | Sibiricose A3                                          | 11.44                                           | Phenolic acid | 1.38 |
| zmxp003107 | C <sub>27</sub> H <sub>30</sub> O <sub>16</sub> | Luteolin-7,3'-di-O-glucoside                           | -15.51                                          | Flavonoid     | 1.38 |
| hmbp002498 | C <sub>21</sub> H <sub>26</sub> O <sub>13</sub> | Scopoletin-7-O-xylosyl(1→6)glucoside                   | -13.44                                          | Coumarin      | 1.38 |
| hmqp003066 | C <sub>35</sub> H <sub>40</sub> O <sub>18</sub> | Luteolin-7-O-(6'''-malonyl)sophoroside-5-O-arabinoside | -12.41                                          | Flavonoid     | 1.38 |
| mws1175    | C <sub>16</sub> H <sub>14</sub> O <sub>4</sub>  | Pinostrobin                                            | -9.84                                           | Flavonoid     | 1.36 |
| mws4167    | C <sub>21</sub> H <sub>18</sub> O <sub>12</sub> | Luteolin-7-O-glucuronide                               | -9.79                                           | Flavonoid     | 1.37 |
| pmn001702  | C <sub>21</sub> H <sub>18</sub> O <sub>12</sub> | Tetahydroxyflavone-7-O-glucuronide                     | -9.70                                           | Flavonoid     | 1.37 |
| lmhn002573 | C <sub>17</sub> H <sub>20</sub> O <sub>11</sub> | Sinapoylglucuronic acid                                | -7.92                                           | Phenolic acid | 1.37 |
| pmb4777    | C <sub>16</sub> H <sub>18</sub> O <sub>8</sub>  | 4-Hydroxy-7-methoxycoumarin- $\beta$ -rhamnoside       | -5.24                                           | Coumarin      | 1.35 |
| hmqp002870 | C <sub>32</sub> H <sub>38</sub> O <sub>20</sub> | Luteolin-7-O-Sophoroside-5-O-arabinoside               | -4.90                                           | Flavonoid     | 1.37 |
| lmgn002253 | C <sub>31</sub> H <sub>36</sub> O <sub>18</sub> | Syringoylcaffeoylquinic acid-D-glucose                 | -4.06                                           | Phenolic acid | 1.36 |

Table S3. List of top 20 differentially expressed metabolites in L18 vs D18 comparison

| Index      | Formula                                         | Metabolite Name                                                | <u>Log<sub>2</sub> (Fold Change)</u><br>LCF/DCF | Class         | VIP  |
|------------|-------------------------------------------------|----------------------------------------------------------------|-------------------------------------------------|---------------|------|
| lmzn006284 | C <sub>30</sub> H <sub>48</sub> O <sub>4</sub>  | 2α-Hydroxyursolic acid                                         | 13.61                                           | Triterpene    | 1.50 |
| pmn001369  | C <sub>32</sub> H <sub>42</sub> O <sub>17</sub> | 1-Hydroxypineolin Diglucoside                                  | 9.51                                            | Lignans       | 1.52 |
| zmxp002867 | C <sub>28</sub> H <sub>32</sub> O <sub>16</sub> | Chrysoeriol-5,7-di-O-glucoside                                 | 8.81                                            | Flavonoid     | 1.37 |
| pmp001005  | C <sub>15</sub> H <sub>12</sub> O <sub>5</sub>  | 1-Hydroxy-3,7-dimethoxyxanthone                                | 4.54                                            | Xanthone      | 1.42 |
| lmmn005958 | C <sub>15</sub> H <sub>16</sub> O <sub>3</sub>  | 3-Hydroxy-furocalamen-2-one                                    | 4.47                                            | Others        | 1.15 |
| pmn001415  | C <sub>24</sub> H <sub>20</sub> O <sub>9</sub>  | Catechin-(7,8-bc)-4β-(3,4-dihydroxyphenyl)-dihydro-2-(3H)-one  | 3.65                                            | Flavanol      | 1.39 |
| pmn001416  | C <sub>24</sub> H <sub>20</sub> O <sub>9</sub>  | Catechin-(7,8-bc)-4α-(3,4-dihydroxyphenyl)-dihydro-2-(3H)-one* | 3.58                                            | Flavanol      | 1.37 |
| hmgp002618 | C <sub>21</sub> H <sub>22</sub> O <sub>10</sub> | Isosalipurposide (Phlorizin Chalcone)                          | 3.19                                            | Chalcone      | 1.43 |
| pmp000589  | C <sub>24</sub> H <sub>22</sub> O <sub>15</sub> | Quercetin-7-O-(6''-malonyl)glucoside                           | 3.03                                            | Flavanol      | 1.30 |
| hmln002189 | C <sub>24</sub> H <sub>22</sub> O <sub>15</sub> | Quercetin-3-O-(6''-malonyl)galactoside                         | 2.86                                            | Flavanol      | 1.41 |
| pmn001702  | C <sub>21</sub> H <sub>18</sub> O <sub>12</sub> | Tetahydroxyflavone-7-O-glucuronide                             | -11.99                                          | Flavonoid     | 1.46 |
| mws4167    | C <sub>21</sub> H <sub>18</sub> O <sub>12</sub> | Luteolin-7-O-glucuronide                                       | -11.81                                          | Flavonoid     | 1.50 |
| mws1175    | C <sub>16</sub> H <sub>14</sub> O <sub>4</sub>  | Pinostrobin                                                    | -10.19                                          | Flavonoid     | 1.36 |
| hmqp003066 | C <sub>35</sub> H <sub>40</sub> O <sub>18</sub> | Luteolin-7-O-(6'''-malonyl)sophoroside-5-O-arabinoside         | -12.41                                          | Flavonoid     | 1.38 |
| lmhn002573 | C <sub>17</sub> H <sub>20</sub> O <sub>11</sub> | Sinapoylglucuronic acid                                        | -4.21                                           | Phenolic acid | 1.50 |
| mws2367    | C <sub>14</sub> H <sub>20</sub> O <sub>7</sub>  | Salidroside                                                    | -3.64                                           | Phenolic acid | 1.50 |
| lmtn002916 | C <sub>22</sub> H <sub>20</sub> O <sub>14</sub> | Mearnsetin-3-O-glucuronide                                     | -3.29                                           | Flavonoid     | 1.19 |
| pme3285    | C <sub>15</sub> H <sub>14</sub> O <sub>5</sub>  | Afzelechin (3,5,7,4'-Tetrahydroxyflavan)                       | -3.24                                           | Flavanol      | 1.41 |
| lmp002529  | C <sub>33</sub> H <sub>40</sub> O <sub>21</sub> | Gossypetin-3-O-rutinoside-8-O-rhamnoside                       | -3.06                                           | Flavanol      | 1.18 |
| lmhn003074 | C <sub>14</sub> H <sub>14</sub> O <sub>8</sub>  | Feruloylmalic acid                                             | -2.88                                           | Phenolic acid | 1.50 |

Table S4. Transcriptome sequencing quality statistics of cotton fiber

| Sample | Raw Reads  | Clean Reads | Clean Base(G) | Error Rate(%) | Q20   | Q30   | GC Content(%) |
|--------|------------|-------------|---------------|---------------|-------|-------|---------------|
| B18a   | 506,012,90 | 48,679,844  | 7.3           | 0.02          | 98.19 | 94.5  | 44.39         |
| B18b   | 566,570,16 | 54,601,176  | 8.2           | 0.02          | 98.35 | 94.92 | 44.12         |
| B18c   | 590,625,96 | 56,644,984  | 8.5           | 0.02          | 98.32 | 94.81 | 44.17         |
| Q18a   | 554,028,02 | 51,282,678  | 7.7           | 0.02          | 98.43 | 95.09 | 44.09         |
| Q18b   | 580,525,30 | 55,213,036  | 8.3           | 0.02          | 98.43 | 95.06 | 44.11         |
| Q18c   | 652,920,36 | 61,998,236  | 9.3           | 0.02          | 98.3  | 94.71 | 44.24         |
| S18a   | 502,940,62 | 47,496,038  | 7.1           | 0.03          | 97.64 | 93.09 | 44.34         |
| S18b   | 539,224,72 | 51,689,246  | 7.8           | 0.02          | 98.3  | 94.74 | 43.86         |
| S18c   | 511,504,78 | 47,514,852  | 7.1           | 0.02          | 98.41 | 95.07 | 44.07         |

Tables S5. List of differentially expressed transcription factor in DCF, LCF and WCF at 18 DPA

| Gene ID                      | TF Family     | B18 vs Q18 | B18 vs S18 | Q18 vs S18 | Description                                  |
|------------------------------|---------------|------------|------------|------------|----------------------------------------------|
|                              |               | Log2 FC    | Log2FC     | Log2FC     |                                              |
| <i>Gohir.A05G074600.v2.1</i> | <i>B3-ARF</i> | 2.93       | ND         | -2.97      | Auxin response factor 4                      |
| <i>Gohir.A05G187900.v2.1</i> | <i>B3-ARF</i> | -1.94      | -3.87      | ND         | Auxin response factor 5                      |
| <i>Gohir.D06G193900.v2.1</i> | <i>AUX</i>    | 3.79       | ND         | -4.56      | Auxin-induced protein AUX22                  |
| <i>Gohir.A08G111000.v2.1</i> | <i>MYB</i>    | 4.72       | 3.76       | ND         | Transcription factor <i>MYB111</i>           |
| <i>Gohir.A07G020200.v2.1</i> | <i>MYB</i>    | 6.50       | 6.31       | ND         | Myb-related protein 123                      |
| <i>Gohir.D06G074700.v2.1</i> | <i>MYB</i>    | 4.02       | 2.92       | ND         | Transcription factor <i>MYB3</i>             |
| <i>Gohir.A13G099200.v2.1</i> | <i>MYB</i>    | 2.28       | 1.83       | ND         | Myb-related protein 5                        |
| <i>Gohir.A06G075700.v2.1</i> | <i>MYB</i>    | 2.70       | 2.12       | ND         | Transcription factor <i>TT2</i> -like        |
| <i>Gohir.D06G074700.v2.1</i> | <i>MYB</i>    | 4.02       | 2.92       | ND         | Transcription factor <i>TT2</i> -like        |
| <i>Gohir.A08G182800.v2.1</i> | <i>bHLH</i>   | 2.94       | ND         | ND         | Transcription factor <i>bHLH1</i>            |
| <i>Gohir.D10G208450.v2.1</i> | <i>NAC</i>    | -1.07      | ND         | ND         | NAC domain containing protein 52             |
| <i>Gohir.A13G064566.v2.1</i> | <i>NAC</i>    | -3.19      | ND         | ND         | NAC domain-containing protein 19-like        |
| <i>Gohir.D06G189700.v2.1</i> | <i>WRKY</i>   | 1.31       | ND         | -1.43      | Probable <i>WRKY</i> transcription factor 40 |
| <i>Gohir.D11G113700.v2.1</i> | <i>WRKY</i>   | 2.33       | ND         | -3.25      | <i>WRKY</i> transcription factor 22          |
| <i>Gohir.D01G045300.v2.1</i> | <i>bZIP</i>   | 2.57       | 1.25       | -1.31      | Basic leucine zipper 61                      |

ND denotes not detected expression

**Table S6. The primers used for qRT-PCR**

| <b>Gene ID</b> |                              | <b>Forward Primer sequences (3'-5')</b> | <b>Reverse Primer sequences (5'-3')</b> |
|----------------|------------------------------|-----------------------------------------|-----------------------------------------|
| <i>F3'5'H1</i> | <i>Gohir.A07G120900.v2.1</i> | CGAGGAGATGGATAAGGTGATTGGC               | GGTGGACACTCTAGGCAAGTTCAAG               |
| <i>ANR1</i>    | <i>Gohir.D05G170300.v2.1</i> | GCCAGCCAGATCGTAGGAACAAAG                | GAGCAACAACCTGACCAGCAATGAC               |
| <i>ANR2</i>    | <i>Gohir.A05G167300.v2.1</i> | CCAGCCAGCTCGTAGGAACAAAG                 | GCAACAACCTGACCAGCAATGAGG                |
| <i>F3H1</i>    | <i>Gohir.D12G059800.v2.1</i> | CTCCTTCAACTCTGACGGCTCTTG                | CCTTAGGACGCTCATCTTCATCACG               |
| <i>F3H2</i>    | <i>Gohir.A12G059400.v2.1</i> | ATTGTTGAGGCTTGTGAGGATTGGG               | CTCTCTCGCAAGACGGGTCATTTT                |
| <i>DFR1</i>    | <i>Gohir.D05G195700.v2.1</i> | CGCCTCTCACCATGCTACCATTATC               | CCACACTCTTCAGGTTCTCATCCAC               |
| <i>DFR2</i>    | <i>Gohir.A05G192500.v2.1</i> | CGCCTCTCACCATGCTACCATTATC               | CCACACTCTTCAGGTTCTCATCCAC               |
| <i>ANS1</i>    | <i>Gohir.D08G195100.v2.1</i> | GGAAGTTGGTGGCGTGGAAGAG                  | GAGCGAGTTCTGGTTGTGGACAC                 |
| <i>ANS2</i>    | <i>Gohir.A08G176400.v2.1</i> | GGAAGTTGGTGGCGTGGAAGAG                  | GAGCGAGTTCTGGTTGTGGACAC                 |

A

## W18 vs L18

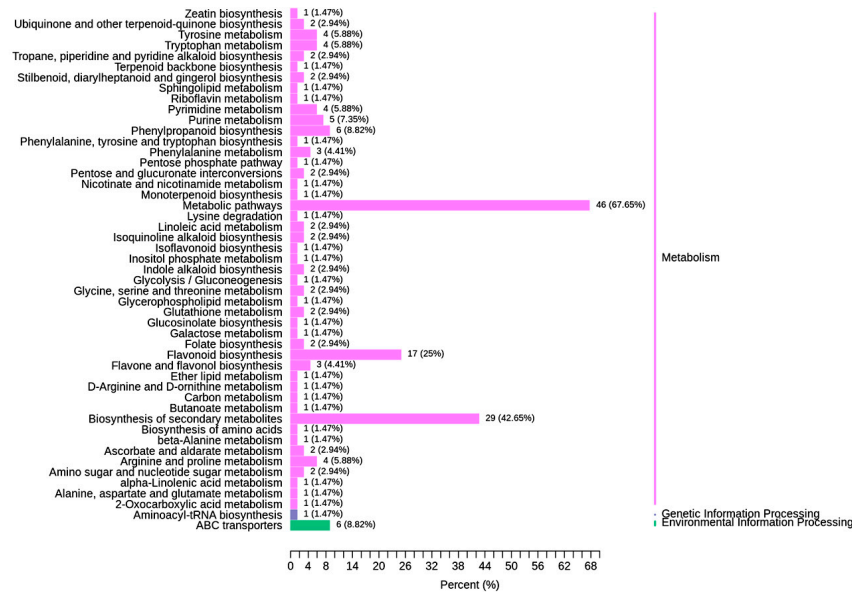

B

## W18 vs D18

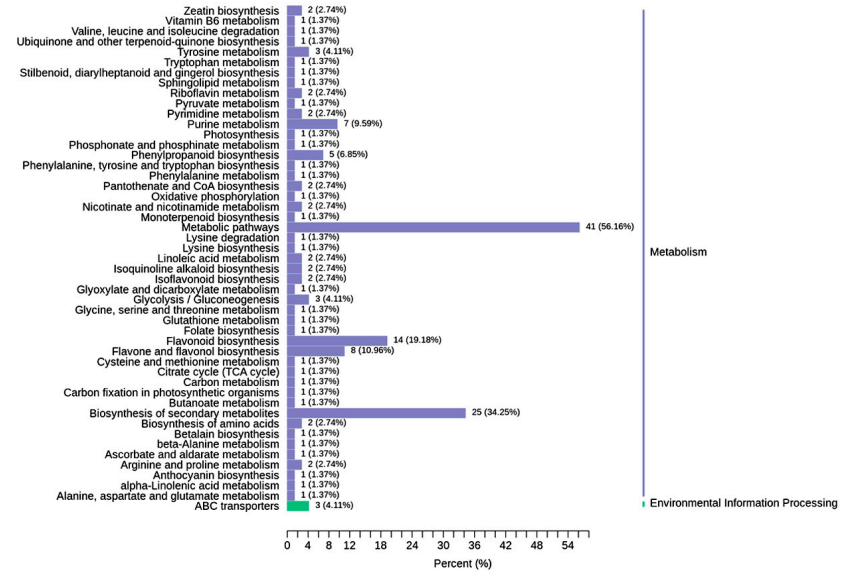

C

## L18 vs D18

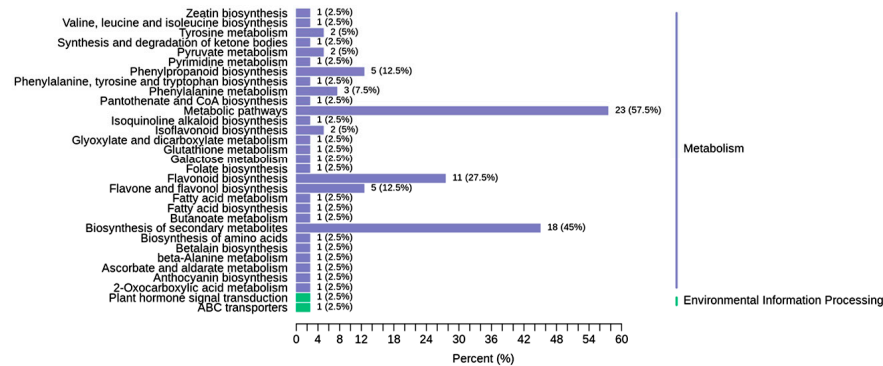

**Figure S1.** Kyoto Encyclopedia of Genes and Genomes (KEGG) pathway analysis of metabolites. The ordinate represents the KEGG metabolic pathway, and the abscissa, the number of metabolites annotated to the pathway and the proportion of the total number of metabolites annotated. L18, D18 and W18 represent deep brown fiber, light brown fiber and white fiber at 18 DPA.
